# Supplementary material for: Drosophila RISC Component VIG and Its Homolog Vig2 Impact Heterochromatin Formation
Source: PubMed Central journal article supplement (PMC2703606; doi:10.1371/journal.pone.0006182), 2009-07-08
Supplement: pone.0006182.s001.pdf [file pone.0006182.s001.pdf]

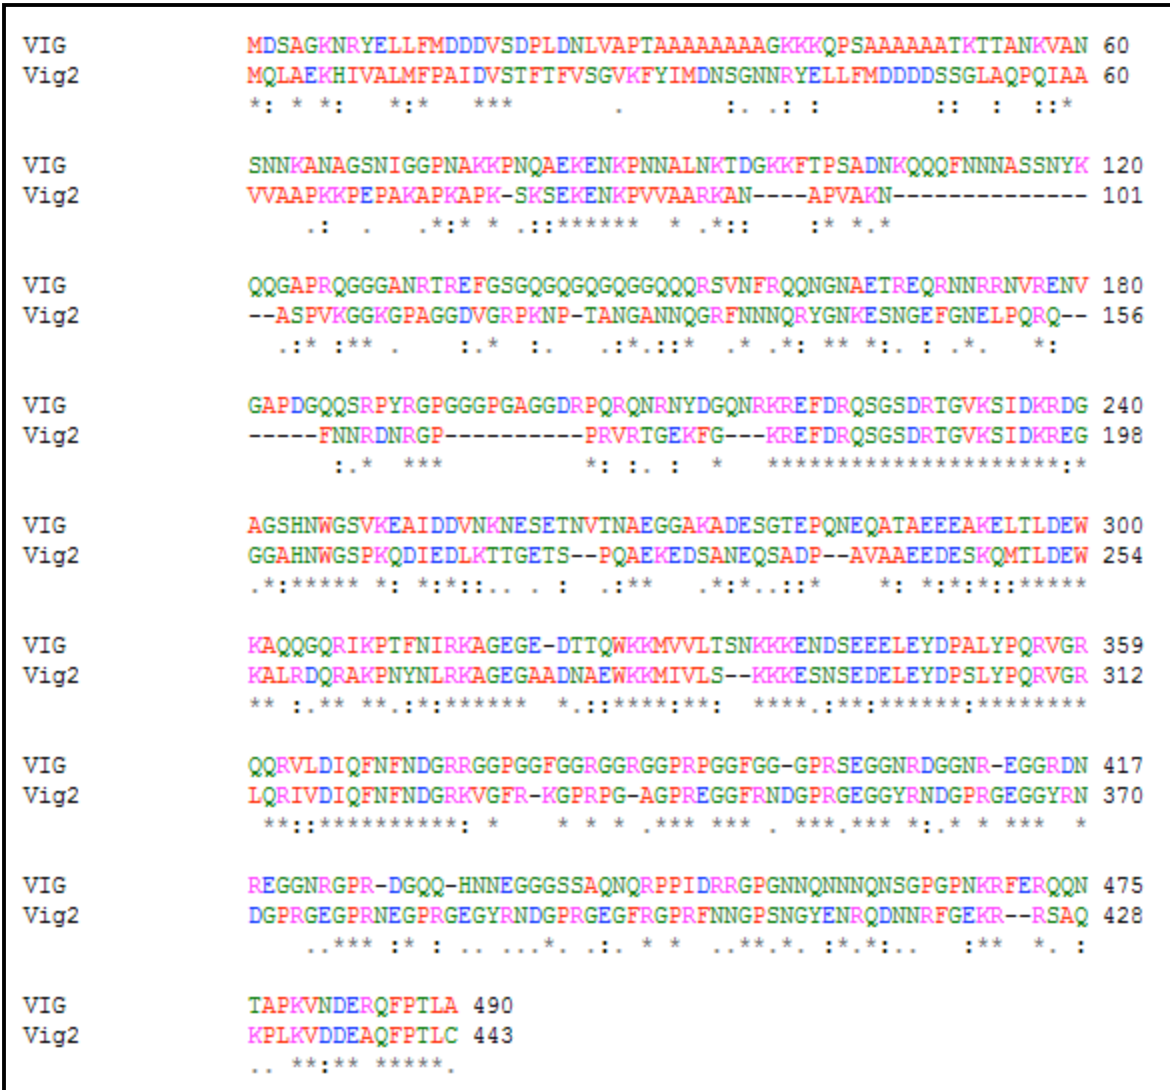

**Supplementary figure 1.** CLUSTAL 2.0.8 VIG and Vig2 protein sequence alignment. Colors were used as follows: small and hydrophobic residues (AVFPMILW) are red; basic (RK) are in magenta; hydroxyl, amine (STYHCNG) and Q are green; others are grey. An alignment displays the following symbols denoting the degree of conservation observed in each column: "\*" means that the residues or nucleotides in that column are identical; ":" means that conserved substitutions have been observed; "." means that semi-conserved substitutions are observed.
