# Supplementary material for: Drosophila RISC Component VIG and Its Homolog Vig2 Impact Heterochromatin Formation
Source: PubMed Central journal article supplement (PMC2703606; doi:10.1371/journal.pone.0006182), 2009-07-08
Supplement: pone.0006182.s003.pdf [file pone.0006182.s003.pdf]

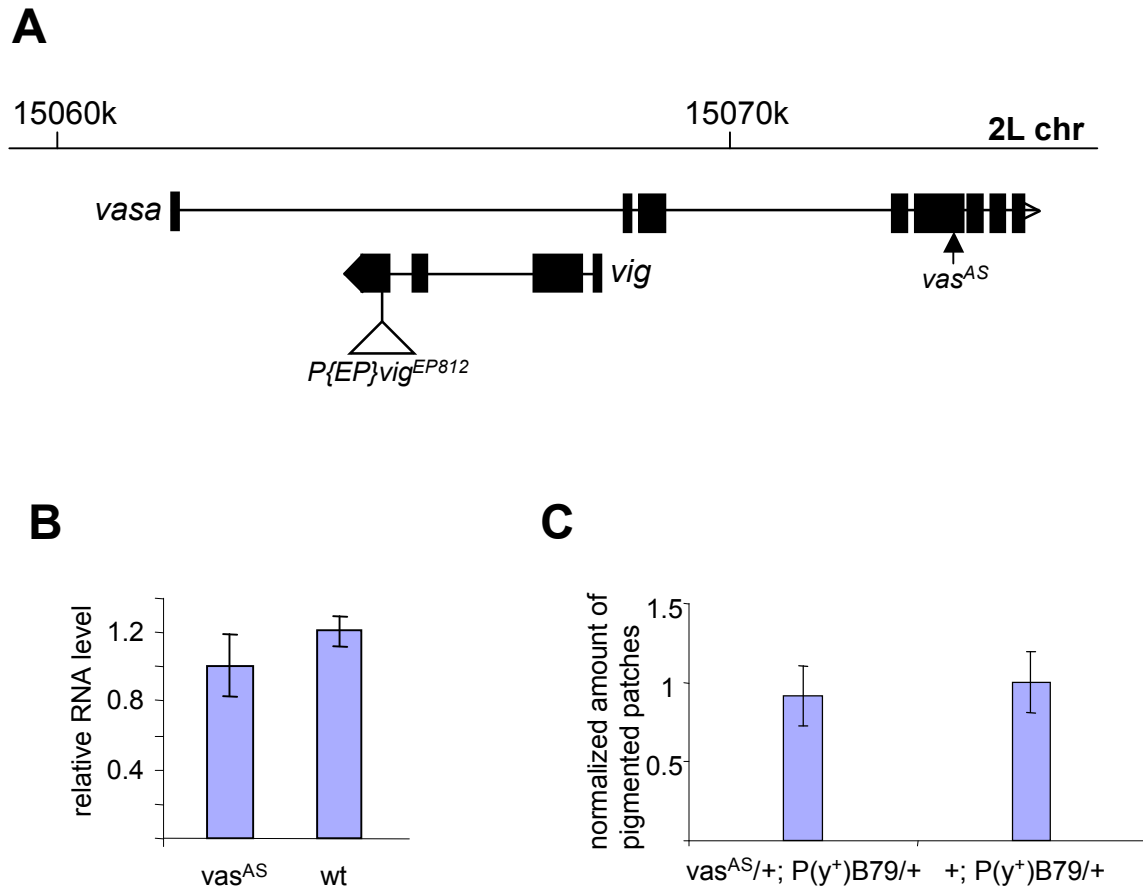

**Supplementary figure 3.** (A) A schematic presentation of the *vasa* gene region. Black blocks represent exons. Transcription direction is shown by horizontal arrows. The insertion site for *P{EP}vig<sup>EP812</sup>* is designated by a triangle; the *vas<sup>AS</sup>* mutation site is marked by a vertical arrow. (B) Levels of *vig* transcription in *vas<sup>AS</sup>* and *WT* flies. Real time RT PCR was performed as described in Materials and Methods. (C) Assessment of *vas<sup>AS</sup>* mutant as a potential PEV modifier using the variegating *yellow* reporter *P(y)B79*. Genetic crosses were performed as described in Materials and Methods. The bar graphs represent the number of pigmented patches normalized to the control as described in Fig. 2. *Vas<sup>AS</sup>* does not change the variegation level of the *yellow* transgene.
