# Supplementary material for: Drosophila RISC Component VIG and Its Homolog Vig2 Impact Heterochromatin Formation
Source: PubMed Central journal article supplement (PMC2703606; doi:10.1371/journal.pone.0006182), 2009-07-08
Supplement: pone.0006182.s004.pdf [file pone.0006182.s004.pdf]

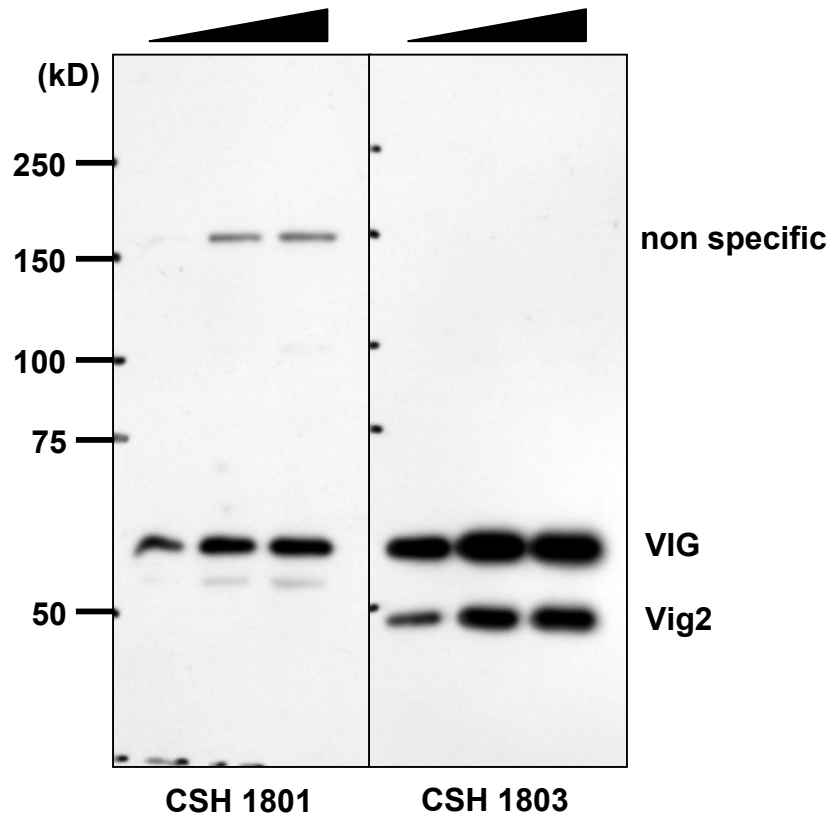

**Supplementary figure 4.** Comparison of two antibodies, CSH1801 and CSH1803, using protein extracts from OR salivary glands. Triangles on the top indicate increased amounts of loaded protein samples.
