# Supplementary material for: Drosophila RISC Component VIG and Its Homolog Vig2 Impact Heterochromatin Formation
Source: PubMed Central journal article supplement (PMC2703606; doi:10.1371/journal.pone.0006182), 2009-07-08
Supplement: pone.0006182.s005.pdf [file pone.0006182.s005.pdf]

**A**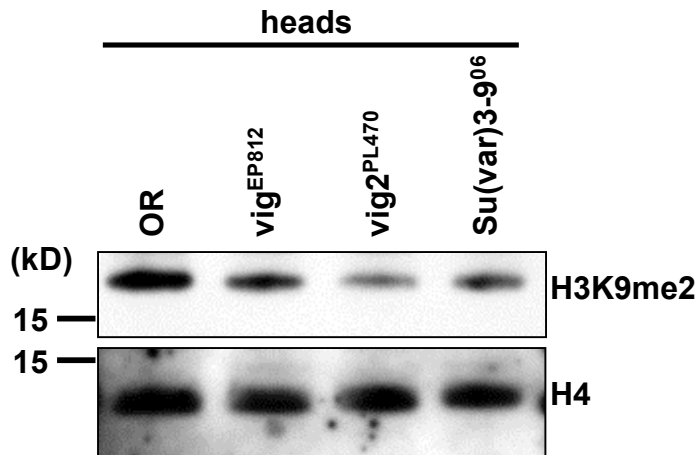**B**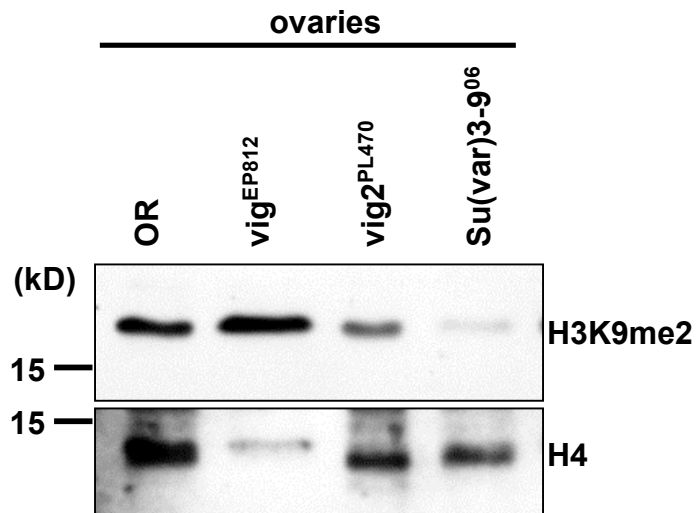

**Supplementary figure 5.** Assessment of H3K9 dimethylation levels in *vig*<sup>EP812</sup> and *vig2*<sup>PL470</sup> mutant strains by Western. (A) Total protein extracts were obtained from adult flies heads. (B) Total protein extracts were obtained from ovaries.
