# Supplementary material for: Drosophila RISC Component VIG and Its Homolog Vig2 Impact Heterochromatin Formation
Source: PubMed Central journal article supplement (PMC2703606; doi:10.1371/journal.pone.0006182), 2009-07-08
Supplement: pone.0006182.s006.pdf [file pone.0006182.s006.pdf]

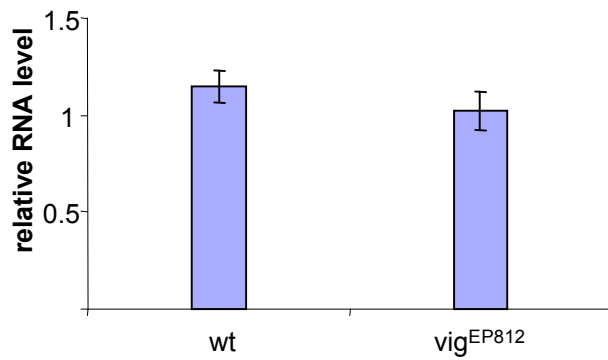

**Supplementary figure 6.** Results of the real time RT PCR assessing the level of *Su(var)205 (HP1)* gene expression in a *vig* mutant. There were no significant changes observed between the *wt* and *vig<sup>EP812</sup>* strain.
